# **Title**

Social information impairs reward learning in depressive subjects: behavioral and computational characterization

## **Authors**

Lou Safra<sup>1,2,3,\*</sup>, Coralie Chevallier<sup>1,2,3</sup>, Stefano Palminteri<sup>1,2,3,\*</sup>

## **Affiliations**

<sup>1</sup>Laboratoire de Neurosciences Cognitives, Institut National de la Santé et de la Recherche Médicale, Paris, France

<sup>2</sup>Département d'Études Cognitives, Ecole Normale Supérieure, Paris, France

<sup>3</sup>Institut d'Études Cognitives, Université de Recherche Paris Sciences et Lettres, Paris, France

\*Corresponding authors: [lou.safra@gmail.fr](mailto:lou.safra@gmail.fr), [stefano.palminteri@ens.fr](mailto:stefano.palminteri@ens.fr)

16 **Abstract (max 218/250)**

17 Depression is characterized by a marked decrease in social interactions and blunted sensitivity  
 18 to rewards. Surprisingly, despite the importance of social deficits in depression, non-social  
 19 aspects have been disproportionally investigated. As a consequence, the cognitive  
 20 mechanisms underlying atypical decision-making in social contexts in depression are poorly  
 21 understood. In the present study, we investigate whether deficits in reward processing interact  
 22 with the social context and how this interaction is affected by self-reported depression and  
 23 anxiety symptoms. Two cohorts of subjects (discovery and replication sample:  $N = 50$  each)  
 24 took part in a task involving reward learning in a social context with different levels of social  
 25 information (absent, partial and complete). Behavioral analyses revealed a specific detrimental  
 26 effect of depressive symptoms – but not anxiety – on behavioral performance in the presence  
 27 of social information, i.e. when participants were informed about the choices of another player.  
 28 Model-based analyses further characterized the computational nature of this deficit as a  
 29 negative audience effect, rather than a deficit in the way others' choices and rewards are  
 30 integrated in decision making. To conclude, our results shed light on the cognitive and  
 31 computational mechanisms underlying the interaction between social cognition, reward  
 32 learning and decision-making in depressive disorders.

33

## 34 MAIN TEXT

35

## 36 Introduction

37

38 One of the core clinical symptoms of depression is anhedonia, which refers to a reduced  
 39 motivation to engage in daily life activities (motivational anhedonia) and a reduced enjoyment  
 40 of usually enjoyable activities (consummatory anhedonia) (1, 2). In principle, this clinical  
 41 manifestation could be explained by reduced reward sensitivity, both in terms of incentive  
 42 motivation and in terms of reinforcement processes (3–5). A direct prediction of this hypothesis  
 43 is that depressive symptoms should be associated with reduced reward sensitivity in learning  
 44 contexts both at the behavioral and neural level. However, while some studies do find  
 45 evidence that depressive symptoms in the general population and in clinical depression are  
 46 associated with blunted reward learning and reward-related signals in the brain (6, 7), others  
 47 indicate no (8, 9) or mixed effects (5). As a consequence, there is no strong consensus about  
 48 which components of reward processing are most predictive of depressive symptoms in both  
 49 the general population and clinical depression (5).

50

51 Another striking clinical manifestation of depressed symptoms is a marked decrease in social  
 52 interactions. Depression is indeed associated with social risk factors, social impairments and  
 53 poor social functioning (10). Surprisingly, despite the importance of the socio-cognitive  
 54 impairments that are often associated with elevated depressive symptoms, non-social aspects  
 55 have received disproportionate attention. Furthermore, when social aspects are investigated  
 56 the focus is often on emotional processing and theory of mind but not on how social  
 57 information is integrated to produce efficient goal-directed behavior (11). In the present study,  
 58 our goal was to investigate whether the reward-learning deficit that is often associated with  
 59 elevated depressive symptoms interacts with the social context (12).

60

61 According to social learning theory, a sizable amount of decisions are not directly shaped by  
 62 people's personal history of reward and punishments, but are rather acquired through social  
 63 observation (13). More specifically, this framework posits that human learning occurs mostly in  
 64 social contexts, where subjects can be influenced by social cues (i.e. others' choices and  
 65 outcomes) (13, 14). In order to test how depressive symptoms affect the integration of social  
 66 cues during reinforcement learning, we administered a variant of a previously validated

67 observational learning task on two independent samples of participants: an exploration sample  
 68 and a replication sample (14, 15). Subjects also completed psychometric questionnaires  
 69 assessing depression and anxiety (a co-morbid trait). The task included a ‘Private’ learning  
 70 condition, in which participants only had access to the outcome of their own choice, and two  
 71 social conditions: the ‘Social-Choice’ condition in which participants had access to the  
 72 demonstrator’s choice, and the ‘Social-Choice+Outcome’ condition in which participants had  
 73 access to the demonstrator’s actions and their outcome (**Figure 1**).

74  
 75 Our design allowed us to test several hypotheses concerning the relation between depressive  
 76 symptoms and learning performance in private and social contexts. First, our design allowed  
 77 us to test whether or not depressive symptoms degrade reward learning *per se*, as assumed  
 78 by the standard account of depression as a reward sensitivity deficit. Second, by comparing  
 79 the ‘Private’ and the ‘Social’ learning contexts, we can assess whether or not depressive  
 80 symptoms are associated to a learning deficit in ‘Social’ contexts, as predicted by evidence of  
 81 socio-cognitive impairments in depressive patients. Finally, thanks to computational analyses,  
 82 we can precisely characterize the learning deficit in the ‘Social’ context either as a primary  
 83 social learning deficit (i.e., impaired imitation) or as a secondary social learning (i.e., a negative  
 84 audience effect).

85  
 86

## 87 **Results**

### 88 **Experimental protocol and quality checks**

89 An online experiment was particularly suited to test our hypothesis because - compared to  
 90 laboratory-based experiments - it provides a more diversified pool of subjects, in terms of  
 91 psychiatric traits and cognitive performance (16–19). Specifically, we tested 50 participants in  
 92 the general population and then ran a direct replication of the experiment on a second  
 93 independent sample of 50 participants. Levels of depressive and anxiety symptoms were  
 94 assessed and spanned a large range (**Table 1**) (20), with good internal consistency (Hospital  
 95 Anxiety Depression scale - depression subscale: Cronbach's alpha 85%; anxiety subscale:  
 96 Cronbach's alpha 84%).

97 Participants were paired with a virtual demonstrator and performed a probabilistic  
 98 reinforcement learning task in three contexts: a 'Private', in which participants performed the  
 99 task individually with no access to the demonstrator's choices and outcomes, and two social  
 00 conditions: the 'Social-Choice' condition in which participants had access to the demonstrator's  
 01 choices, and the 'Social-Choice+Outcome' condition in which participants had access to the  
 02 demonstrator's choices and their outcome. Overall, participants displayed robust instrumental  
 03 learning by choosing the most rewarded symbol above chance in all conditions ('Private':  $M =$   
 04  $0.65 \pm 0.03$ ,  $t(99) = 11.42$ ,  $p < .001$ ; 'Social-Choice' :  $M = 0.65 \pm 0.03$ ,  $t(99) = 11.63$ ,  $p < .001$ ;  
 05 'Social-Choice+Outcome':  $M = 0.67 \pm 0.03$ ,  $t(99) = 12.36$ ,  $p < .001$ ;  $\pm$  corresponds to the 95%  
 06 confidence intervals; Figure 1A).

### 08 **Assessing observational learning**

09 Contrary to previous studies (14, 15), we used an online adaptive learning algorithm  
 10 that determined the demonstrator's behavior (Q-learning with learning rate = 0.5 and choice  
 11 temperature = 10). As a consequence, the virtual demonstrators displayed realistic learning  
 12 curves with some variability of performance. We predicted that observational learning would  
 13 result in a correlation between the correct choice rate of the participants and that of the  
 14 demonstrator in a given learning session. To test this prediction, we used a mixed linear  
 15 regression with 'Condition' ('Private' vs 'Social-Choice' vs 'Social-Choice+Outcome') as a  
 16 within-subject factor and the demonstrator's performance in a given learning session as a  
 17 between-subject variable. As predicted, a higher demonstrator's percentage of correct choices  
 18 (i.e., 'good' demonstrations) was associated with a higher participants' rates of correct choices

in both social conditions ('Social-Choice' vs 'Private':  $t(495) = 2.70$ ,  $p = .007$ ; 'Social-Choice+Outcome' vs 'Private':  $t(495) = 2.25$ ,  $p = .025$ ) but not in the Private condition ( $t(495) = 0.10$ ,  $p > .250$ ; **Figure 2A**).

In order to confirm that participants actually integrated the virtual demonstrator as a social partner, we measured the influence of participants' rating of trustworthiness of the demonstrator's face on social learning. An effect of perceived trustworthiness evaluations was found, such that participants who perceived the demonstrator's avatar as more trustworthy had higher correct choice rates in the 'Social-Choice' ( $t(98) = 3.17$ ,  $p = .002$ ) and in the 'Social-Choice+Outcome' conditions ( $t(98) = 2.58$ ,  $p = .012$ ) but not in the 'Private' condition ( $t(98) = 1.08$ ,  $p > .250$ ; **Figure 2B**). This effect of the social evaluation of the demonstrator's avatar confirms that participants processed the information in a social context.

### Correlation between depressive symptoms and performance

To test the effect of depression, the mixed linear logistic regression also included depressive symptoms as a between-subject variable. Importantly, anxiety, which is a comorbid trait of depression (21, 22), was also included as a controlling factor (the regression also included a range of controls listed in **Table 2**). The analysis revealed a significant effect of depressive symptoms, such that the higher the depressive symptoms, the lower the rate of correct choices in the 'Social-Choice' condition compared to the 'Private' condition ( $t(489) = -2.64$ ,  $p = .009$ ; no other significant effect of depression and anxiety scores was evidenced: all  $ps > .250$ ; **Figure 3A**). Importantly, the negative effect of depression in the 'Social-Choice' condition was particularly robust, because it was found in both the discovery and the replication sample and in the blocks with stable and reversal contingencies (within-subject) (**Figure 4**).

Finally, we tested whether the difference in correct choice rates between the 'Social-Choice' and 'Private' conditions could accurately identify participants with 'severe' depression symptoms (i.e. scoring  $> 10$  on the HAD depression subscale (20)). The classification analysis revealed that the performance difference between the 'Social-Choice' and the 'Private' condition identified the participants with 'severe' depressive symptoms with a good accuracy of  $76 \pm 1\%$  and both good a sensitivity, or True Positive Rate ( $78 \pm 2\%$ ) and specificity, or True Negative Rate ( $63 \pm 3\%$ ) of the classifier (**Figure 3B**).

## 50 Computational model-based analyses

51 Although model-free analyses reveal a robust negative effect of depressive symptoms  
 52 on learning in the ‘Social-Choice’ condition, they do not elucidate the cognitive mechanisms  
 53 underlying this effect. Indeed, the effect of depressive symptoms could either be due to  
 54 differences in social information processing, such as the demonstrator’s choices and outcomes  
 55 (i.e. a *primary* social learning deficit) or to differences in the weighting of the information  
 56 generated by participants’ own choices when social information is also available (i.e. a  
 57 *secondary* social learning deficit or *audience effect*). These two hypotheses are hard to tease  
 58 apart based on raw behavioral analyses, because both predict a reduced correct choice rate in  
 59 the ‘Social’ conditions. Thus, to arbitrate between these two possibilities, we fitted a previously  
 60 validated social reinforcement learning model (14, 23). This model allows for biasing  
 61 participants’ choice depending on their demonstrator’s choice in the ‘Social-Choice’ (i.e.  
 62 *imitation*) condition and to update the value attributed to each symbol depending on the  
 63 demonstrator’s outcome in the ‘Social-Choice+Outcome’ condition (i.e. *vicarious trial-and-*  
 64 *error*). Compared to the original model and to directly assess the ‘socially induced individual  
 65 learning deficit’ hypothesis (14), we allowed participants to have different individual learning  
 66 parameters in the ‘Private’ and in the two social conditions (‘Social-Choice’ and ‘Social-  
 67 Choice+Outcome’ conditions; **Figure 5A**).

## 69 Computational effects of depressive symptoms

70 We analyzed the model parameters fitted on participants’ actual behavior with structural  
 71 equation modeling using depression scores as the independent variable. Higher depression  
 72 scores were specifically associated with lower learning rates in the ‘Social’ conditions  
 73 (depression:  $z = -2.41$ ,  $p = .016$ ; other  $ps > .199$ ; **Figure 5B**). Interestingly, high depression  
 74 scores were not solely associated with decreased learning rates in the ‘Social’ conditions, but  
 75 also with decreased learning rates in the ‘Social’ conditions *compared* to the ‘Private’ condition  
 76 ( $t(98) = -2.25$ ,  $p = .027$ ; **Figure 4C**), which indicates that the presence of social information  
 77 decreased the learning rate of the most depressed participants. Adopting a computational  
 78 psychiatry approach, we tested whether the difference in learning rates between the ‘Private’  
 79 and ‘Social’ conditions could identify ‘severe’ depressive symptoms (i.e. HAD depression  
 80 subscale score above 10 (20)). The difference in learning rates detected participants with  
 81 severe depressive symptoms with good accuracy ( $79 \pm 1\%$ ), good sensitivity ( $84 \pm 1\%$ ), but

low specificity ( $53 \pm 3\%$ ). A comparison between a classifier based on the model parameters and a classifier based on correct choice rates revealed that the model-based classifier was more accurate at detecting participants with ‘severe’ depressive symptoms ( $t(198) = 3.69, p < .001$ ), and more sensitive ( $t(198) = 5.09, p < .001$ ) but less specific ( $t(198) = -3.73, p < .001$ ) than the classifier based on correct choice rates.

## Model simulations analyses

Model-based analyses indicated that depression severity specifically reduced individual learning rate in ‘Social’ conditions ( $\alpha_P$ ): a parameter that is used both in the ‘Social-Choice’ and the ‘Social-Choice+Outcome’ condition. Model-free behavioral analyses showed that the learning deficit associated with depression severity was specific to the ‘Social-Choice’ condition. To ascertain that this computational result was compatible with our model-free observation, we ran the same statistical analysis on simulated data (24). Crucially, data simulated using the fitted parameters accurately recovered the decrease in performance associated with depression scores in the ‘Social-Choice’ condition compared to the ‘Private’ condition ( $t(488) = -2.18, p = .030$ ; Figure 4D) as well as the non significant effect of depression scores in the ‘Social-Choice+Outcome’ condition compared to the ‘Private’ condition ( $t(488) = -1.32, p = .188$ ) and in the ‘Private’ condition ( $t(96) = -0.37, p > .250$ ). Thus, the simulations captured the specificity of the behavioral effect of depression scores and illustrate that our model provides an accurate description of the data.

## Checking parameter recovery

As we were interested in the modulation of specific parameters by depression scores we tested whether our task allowed us to successfully retrieve a correlation between parameters in simulated datasets, an important quality check often referred to as ‘parameter recovery’ (24). To do so, we ran 100 sets of simulations for each parameter, each simulating 100 participants, with the parameter of interest correlating with an arbitrary variable and the other parameters being randomly fixed in a defined range. The simulated data were then fitted using our social reinforcement-learning model. Overall parameter recovery was very good, especially for the parameters of the social conditions, with significant correlations were found in the 100% of the simulated datasets (average correlation coefficient of the parameters:  $r = 0.73 \pm 0.01$ ). Importantly, the recovery of the correlations was specific to the manipulated



14 parameter with false alarms detected in less than 10% of the cases except for learning rate  
15 and choice temperature in the 'Private' condition (which was not our condition of interest)  
16 (**Figure 5C**). This result indicates that it is very unlikely that a correlation of one of our  
17 parameters with participants' HAD depression scores is actually due to an effect of depression  
18 scores on another parameter.

19

## 20 Discussion

21 In the present study we assessed reinforcement learning with a behavioral paradigm involving  
 22 both private and social contexts, while concomitantly assessing depressive and anxiety  
 23 symptoms. First, we replicate previous findings showing that subjects integrate the  
 24 demonstrator's choices and outcomes, which is consistent with the idea that social learning  
 25 processes (both in terms of imitation and vicarious trial-and-error) play a role in human  
 26 reinforcement learning (14, 15, 25–27). Second, we show that the severity of depressive  
 27 symptoms is associated with a learning impairment that is specific to the learning context  
 28 where participants are informed about the demonstrator's choices (social context). This  
 29 negative effect was robust to the inclusion of anxiety, and robust across experiments and  
 30 outcome contingencies. Finally, computational analyses allowed us to characterize the effect  
 31 of depressive symptoms as a secondary social learning deficit, i.e. a reduction of the learning  
 32 rate in social contexts.

33  
 34 We found that depressive symptoms had a specific effect on imitation in the 'Social-Choice'  
 35 condition. Crucially, the effect was robust to the inclusion of anxiety, which did not modulate  
 36 performance in our task. That anxiety has no effect may come as a surprise given that  
 37 previous studies have found that anxiety is associated with deficits in social and non-social  
 38 reinforcement learning (28). One possible explanation is that this anxiety is more strongly  
 39 linked to classical fear conditioning, rather than reward-based instrumental learning (29).  
 40 Depressive symptoms might thus undermine social reinforcement learning in instrumental and  
 41 reward-maximization contexts, while anxiety might affect the same processes when outcomes  
 42 are independent from the participants' choices (i.e. Pavlovian learning) and when outcomes  
 43 have a negative valence (aversive contexts).

44  
 45 Model-free analyses *per se* do not allow us to pinpoint the psychological mechanisms  
 46 underlying the negative effect of depressive scores on correct choice rates in the 'Social-  
 47 Choice' context. The absence of interaction between the demonstrator's performance and  
 48 depressive symptoms suggests that depressive symptoms did not lead participants to  
 49 disproportionately follow 'bad examples' or to be insensitive to 'good examples'. However,  
 50 interpretations based on negative results are, at best, unsafe. To formally characterize the  
 51 psychological mechanisms of the detrimental effects of depressive symptoms we thus turned  
 52 to model-based analyses.

53

54 We fitted subjects' choice with a slightly modified version of a previously validated social  
 55 reinforcement-learning model (14). As in standard algorithms, the model assumes that  
 56 subjects learn option values via the calculation of a reward prediction error, which are  
 57 moderated by a learning rate ( $\alpha_P$ ) and that choices are generated via a soft-maximization  
 58 process, whose stochasticity is governed by a temperature ( $\beta_P$ ) (30). In addition to this 'private'  
 59 learning module, the model also displays sensitivity to social information: in the 'Social-Choice'  
 60 condition the demonstrator's choice biases the subsequent subject's choice (the magnitude of  
 61 this effect is governed by an imitation rate  $\kappa$ ) and in the 'Social-Choice+Outcome' condition the  
 62 demonstrator's outcome is integrated into the subject's value function with a vicarious learning  
 63 rate ( $\alpha_O$ ). Finally, we also allowed for different private learning rates and temperatures in the  
 64 'Social' contexts ( $\alpha_S$  and  $\beta_S$ ). This precise model parameterization allowed us to disentangle  
 65 two different hypotheses concerning the drop in performance associated with depressive  
 66 symptoms in the 'Social-Choice' condition. A correlation between depression scores and  
 67 imitation rates and/or vicarious learning rates would imply what we define a 'primary' social  
 68 learning impairment (i.e. an impairment of the social learning processes *per se*). On the  
 69 contrary, a correlation between the 'Social' context-specific learning rate and/or temperature  
 70 would imply a 'secondary' social learning impairment (i.e. an impairment of the private learning  
 71 processes in presence of social information). We found that depressive scores negatively  
 72 correlated with the private learning rate in the social context ( $\alpha_S$ ), thus indicating that the effect  
 73 is consistent with a secondary impairment and is specific to the learning (as opposed to the  
 74 decision) process. In other words, our computational results suggest that one possible way in  
 75 which depressive symptoms affect learning in social contexts is conceptually similar to a  
 76 negative audience effect (31, 32), where the presence of social signals (the demonstrator's  
 77 choices) induces a reduction of subjects' instrumental performance.

78

79 From a methodological point of view, our study exemplifies how computational approaches can  
 80 provide new insights on the way in which cognitive processes vary with clinical symptoms.  
 81 Indeed, computational modeling demonstrated that the effect of depressive symptoms was  
 82 selective of the way individual information was processed (33, 34). It is worth noting that these  
 83 conclusions were only allowed after a careful testing of the ability of our task to precisely  
 84 identify which model parameter would be influenced by depressive symptoms (24). The exact  
 85 cognitive and psychological mechanisms that mediate the negative effect of social signals in

instrumental performance remain to be characterized. One possibility given that depression is associated with lower cognitive functioning in general (35) is that the mere presence of others exacerbates these difficulties by capturing already scarcer attentional resources. Alternatively, negative perception of self and negative comparison to others are core symptoms of depression (36). Therefore, it is possible that the most depressed participants perceived their demonstrator's behavior as more reliable, thus underweighting the information they acquired through their own experience.

Our results provide new evidence that depression-related reward learning deficits are highly context-dependent (3–5), and suggest that the differences in learning rates associated with depressive symptoms may only arise in social contexts (5, 9). Crucially, our results suggest that supposedly neutral aspects of the experimental setup (such as whether or not the task is done in the presence or absence of an experimenter), may affect the results and explain inconsistent findings (42). In line with recent propositions, our results also suggest that a deeper investigation of socio-cognitive impairments in depression may provide important new insights (10, 11). Finally, we suggest that developing tools assessing reward learning outside and inside social contexts (characterized either by the presence of another player or by the social nature of the outcomes (43)) may prove useful to improve diagnosis and personalize treatments of depressive syndromes in the long term.

An obvious limitation of our study, is that we did not control for participants' actual diagnosis and treatment, which may be problematic since medication interacts with decision-making in depression (44). Therefore, our results would benefit from being replicated in carefully controlled population, while controlling for medication status and medical history. This replication would allow us to further measure the diagnostic value of our behavioral task and associated computational model-based analyses. Indeed, in the present study, we only tested its ability to detect high depressive scores as identified by a self-rated scale (20). It would be particularly interesting to test whether our behavioral and computational measures improve existing self-assessments that detect clinically diagnosed cases of depression.

Our results have implications beyond their clinical relevance. Consistent with the 'social learning theory' participants imitated demonstrators' choices ('Social-Choice' condition) and learned from their outcomes ('Social-Choice+Outcome' condition) (13, 14). At the behavioral

level, these two psychological processes were manifest in the fact participants' performance was modulated by the demonstrators' performance. In particular, we found that participants observing a demonstrator performing 'well' performed better in the social compared to the private learning context. Importantly the opposite was also true: participants observing low performing demonstrators displayed lower performance in the social compared to the private context. This latter result is in apparent contrast with the normative view that imitation should be biased toward successful individuals in order to be evolutionary adaptive (45–47). This is also in contrast with recent empirical evidence using a very similar paradigm and showing that imitation rate is modulated by the actual performance of the demonstrator, so that demonstrators making random (i.e., non reward-maximizing) decisions are less imitated (15). Two differences between the previous design and ours may explain this discrepancy. First, the previous study involved mild electric shocks (primary reinforcer), while our study involved abstract points to be converted into money (secondary reinforcer). More importantly perhaps, the previous design involved a between-subjects design with two groups of participants paired either with a consistently good or with a consistently bad participant, while in our experiments the performance of the demonstrator was allowed to fluctuate in a within-subject manner around an optimal behavior. Therefore, it could also be argued that our experiment is not well-suited for measuring demonstrators' performance effects on participants' imitation behavior as such effects require a relatively long and stable reputation building process (48, 49).

The question remains whether or not in our task social learning (imitation and vicarious trial-and-error) engaged domain-specific social cognitive module or domain-general information processing modules. In the absence of additional data (such as neuroimaging) we cannot provide a definitive answer. However, evidence from post-learning face ratings provides some clues (50). We found a positive correlation between performance in the social contexts and the demonstrator's judgment of trustworthiness. Even if we cannot infer a causal link and its direction from the post-learning face evaluation, these results suggest that a specific socio-cognitive module (face evaluation) correlated with instrumental performance, thus demonstrating the engagement of social information-specific processing and our reinforcement learning task.

## 53 **Materials and Methods**

### 54 **Participants**

55 Two independent cohorts of 100 American participants, similar in terms of reported age (mean  
56 reported age across the two cohorts:  $33.39 \pm 2.03$ ) and of reported male/female ratio (mean  
57 reported male/female ratio across the two cohorts: 35%; see Table) were recruited via Amazon  
58 Mechanical Turk to participate in this online study. Each participant received a fixed 4\$ amount  
59 for completing the 40-minute task to which a bonus earned during the experiment was then  
60 added (average bonus: 0.49\$). Participant received a description of the study and signed an  
61 informed consent before starting the experiment. The study was approved by the ethical  
62 committee. The first cohort corresponded to a 'discovery experiment' where we explored the  
63 relation between instrumental performance and clinical scores; the second cohort  
64 corresponded to a 'replication experiment' where we tested the robustness and replicability of  
65 the effect identified in the first experiment.

### 67 **Experimental design**

68 Participants performed the probabilistic instrumental learning task described in the Results  
69 section (**Figure 1A**). The task was programmed on Qualtrics and was composed of six  
70 learning blocks of 20 trials each. In each block, participants had to choose between two cues.  
71 Cues were characters of the agathodaimon font and were always presented in pair and only in  
72 one block *per* subject. The cue-to-condition attribution was randomized across subjects.  
73 Participants made their choice by pressing the E or P keys to choose the leftmost or rightmost  
74 symbol. Participants were given no explicit information on reward probabilities, which they had  
75 to learn through trial and error. In addition, they were encouraged to accumulate as many  
76 points as possible, with their final amount of points being translated into bonus money at the  
77 end of the experiment (conversion rate: 40 points equals 1\$ bonus). In each pair, cues were  
78 associated with reciprocal reward probabilities (20/80% or 30/70%). For instance, in a 30/70%  
79 pair, the most rewarded cue provided a positive outcome (+1 point) 70% of the times and a  
80 negative outcome (-1 point) 30% of the time, while the less rewarded cue provided a negative  
81 outcome 70% of the time and a positive outcome 30% of the time.

82 Participants were told they had been paired with another player at the beginning of the  
83 experiment with whom they played in turn in each trial. As in previous studies (Suzuki et al.  
84 Neuron 2012), the behavior of the demonstrators was determined by a reinforcement learning

algorithm (Q-learning) with a reasonable set of free parameters ( $\alpha = 0.5$ ,  $\beta = 10$ ; see below for a description for the Q-learning and its parameters). To avoid social perceptual biases, the other player was represented by a neutral avatar, chosen to be generally perceived as neither dominant or submissive nor trustworthy or untrustworthy (51). Participants had to choose their own avatars in a set of other 16 identities (8 female, 8 male) at the beginning of the task. Participants performed this task in three different contexts with different amounts of social information: a 'Private' condition in which they did not have access to the demonstrator's behavior, a 'Social-Choice' condition in which participants could see the demonstrator's behavior but not their outcomes and a 'Social-Choice+Observation' in which participants could observe the demonstrator's decisions and outcomes. Importantly, participants performed each condition ('Private', 'Social-Choice' and 'Social-Choice+Outcome') twice. In the 'Stable' type of contingency, outcome probabilities were set at 30/70% and did not change during the block. In the 'Reversal' type of contingency, outcome probabilities were set at 20/80%.and was inverted across cue after 10 trials (in average). Finally, at the end of the experiment, participants rated their demonstrator's avatar on three personality traits (trustworthiness, dominance and competence) and completed the Hospital Anxiety and Depression Scale (20) as well as the Peters et al. Delusions Inventory, that was included in the exploratory analysis of the 'discovery' experiment and then discarded in absence of any significant effect and its inclusion did not affect the effect of depression.

## Statistical analyses

### *Percentage of correct choices*

Percentage of correct choices were extracted for each block and used as a dependent variable. A mixed linear regression with both random intercept and random slopes was conducted on correct choice rates taking participants' ID as a random factor, condition ('Private', 'Social-Choice' vs 'Social-Choice+Outcome') as within-subject variables and depression and anxiety scores as well as demonstrator's performance and trustworthiness judgment as between-subject variables (**Table 2**).

### *Diagnostic value*

Out of sample tests were used to assess the diagnostic value of our task, i.e., its ability to distinguish participants scoring below the 'severe symptoms' threshold in depression scale



from those above this threshold. 50 participants were randomly extracted from the entire sample and used to optimize a classifier of 'severe' depressive symptoms (HAD depression subscale score above 10 (20)) using either the difference in correct choice rates between the 'Social-Choice' and the 'Private' conditions (model-free measure) or the difference in learning rates between the Private and social information conditions ( $\alpha_s$  minus  $\alpha_p$ ; model-based measure; see below). The classifier and the associated optimal cut-off was tested on the 50 remaining participants. This operation was repeated 100 times in order to estimate the average accuracy, sensitivity and sensibility of the classifiers.

25

## 26 **Computational analyses**

### 27 *Computational model*

28 To fit the behavioral data, we used a social reinforcement learning model previously presented  
29 by Burke et al. (14). Individual learning and decision-making were modeled with classical  
30 softmax (eq.1) and delta-rule (eq.2) functions, respectively governed by learning rate and  
31 choice randomness (or temperature) parameters:

$$32 \quad (1) \quad P_t(s_t, a_t) = 1 / (1 + e^{(\Delta Q_t(s_t)) * \beta})$$

$$33 \quad (2) \quad Q_{t+1}(s_t, a_t) = Q_t(s_t, a_t) + \alpha_p * RPE_t$$

34

35 Where  $RPE_t$  is the reward prediction error calculated as follows (eq.3):

$$36 \quad (3) \quad RPE_t = R_t - Q_t(s_t, a_t)$$

37 The only change we made was the inclusion of different learning rates and inverse  
38 temperature parameters in the 'Private' ( $\alpha_p$ ,  $\beta_p$ ) and social information ( $\alpha_s$ ,  $\beta_s$ ) conditions.  
39 During the 'Social-Choice' condition, the model assumes that the Demonstrator's choice  
40 induces an 'action' prediction error ( $APE_t$ ; (eq.4)), which measures how surprising the  
41 Demonstrator's choice is, given the subject's current estimate of the option values:

$$42 \quad (4) \quad APE_t = 1 - Q_t(s_t, a_t)$$

43 The  $APE_t$  is then used to bias the subject's choice probability (eq.5) in the subsequent trial and  
44 the effect is scaled by a parameter  $\kappa \in \{0-1\}$ :

$$45 \quad (5) \quad P_{t+1}(s_t, a_t) = P_t(s_t, a_t) + \kappa * APE_t$$



Finally, in the ‘Social-Choice+Outcome’ trials, the model assumes that the Demonstrator’s outcome induces an ‘observational’ reward prediction error (eq.5), which is scaled by observational learning rate  $\alpha_o \in \{0-1\}$  (eq.6):

$$(5) \quad OPE_t = R(partner)_t - Q_t(s_t, a_t)$$

$$(6) \quad Q_{t+1}(s_t, a_t) = Q_t(s_t, a_t) + \alpha_o * OPE_t$$

To sum up, our computational modeling allowed us to address both *primary* social learning deficits (*i.e.* learning deficits captured by the parameters  $\kappa$  and  $\alpha_o$ , which are specific to social information) and *secondary* social learning deficits (*i.e.* learning deficits captured by the parameters  $\beta_s$  and  $\alpha_s$ , which are specific to individual learning in contexts where social information is available).

We optimized the model parameters by minimizing the Laplace approximation to the model evidence (log of the posterior probability: LPP) (eq.7):

$$(7) \quad LPP = \log(P(\text{data}|\theta_{1,...,n})) + \sum_{k=1}^n \log(P(\theta_k))$$

Where D represents the data,  $\theta_{1,...,n}$  the model, and  $\theta_k$  represents one of the  $n$  parameters of the computational model. The LPP represents a trade-off between the model’s accuracy and complexity: it increases with the likelihood of the model given the data (a measure of fit) and decreases with the number of parameters. By including priors over the parameters, this method avoids degenerate parameter estimation. In our analysis, the priors were defined as a gamma function (gampdf(1.2,5)) for the temperature parameters (range:  $0 < \beta < \text{Infinite}$ ) and as a beta function (betapdf(1.1,1.1)) for the learning and imitation rates (ranges:  $0 < \alpha < 1$ ,  $0 < \kappa < 1$ ) as described in (52)

Importantly, LPP analysis suggested that the social reinforcement learning fit the data better than a simple Q-learning model without social influence, even accounting for its extra-complexity (social reinforcement learning model: posterior probability:  $90 \pm 3\%$ ; exceedance probability: 100%). As a control analysis, in order to ensure that our model comparison criterion was not over-fitting prone, we fit the behavior of the virtual demonstrators that we generated with a Q-learning model. This model recovery analysis (24) correctly indicated that the simple Q-learning model explained the demonstrators’ data better (social reinforcement learning model: posterior probability:  $100 \pm 0\%$ ; exceedance probability: 100%).

78 Because the model parameters were correlated with each other (maximal correlation:  $r = 0.53$ ),  
 79 we used structural equation modeling to analyze the influence of depression scores on the  
 80 model parameters. This technique allowed to test the influence of depression scores on each  
 81 parameter while simultaneously accounting for the inter-correlations of the dependent  
 82 variables (the model free parameters) and of the independent variable (the depression score).

83

#### 84 *Model simulation analyses*

85 Finally, we assessed the ability of the model to recover the observed behavioral effect of  
 86 depressive symptoms using model simulations (24). For each participant, we simulated  
 87 behavioral data for each condition based on their best fitting parameters. Importantly, a  
 88 simulated demonstrator was also generated, such that the simulated data were completely  
 89 independent of the contingencies actually experienced by the participants. This procedure was  
 90 repeated 100 times, to avoid any effect of participant's and demonstrator's history of choice  
 91 and outcomes. Analysis of the recovered percentage of correct choices was ran on the  
 92 averaged rates of correct choices across the 100 simulations using a linear mixed regression  
 93 taking the exact same predictors as the mixed general linear model used for analyzing  
 94 participants' percentage of correct choices.

95

96

## 97 References and Notes

- 98 1. D. A. Pizzagalli, A. L. Jahn, J. P. O'Shea, Toward an objective characterization of an anhedonic  
99 phenotype: A signal-detection approach. *Biological Psychiatry*. **57**, 319–327 (2005).
- 00 2. S. H. Kennedy, Core symptoms of major depressive disorder: relevance to diagnosis and treatment.  
01 *Dialogues Clin Neurosci*. **10**, 271–277 (2008).
- 02 3. C. Chen, T. Takahashi, S. Nakagawa, T. Inoue, I. Kusumi, Reinforcement learning in depression: A  
03 review of computational research. *Neuroscience & Biobehavioral Reviews*. **55**, 247–267 (2015).
- 04 4. N. Eshel, J. P. Roiser, Reward and Punishment Processing in Depression. *Biological Psychiatry*. **68**, 118–  
05 124 (2010).
- 06 5. Q. J. Huys, D. A. Pizzagalli, R. Bogdan, P. Dayan, Mapping anhedonia onto reinforcement learning: a  
07 behavioural meta-analysis. *Biol Mood Anxiety Disord*. **3**, 12 (2013).
- 08 6. C. Hägele *et al.*, Dimensional psychiatry: reward dysfunction and depressive mood across psychiatric  
09 disorders. *Psychopharmacology*. **232**, 331–341 (2015).
- 10 7. M. Rothkirch, J. Tonn, S. Köhler, P. Sterzer, Neural mechanisms of reinforcement learning in  
11 unmedicated patients with major depressive disorder. *Brain*. **140**, 1147–1157 (2017).
- 12 8. R. B. Rutledge *et al.*, Association of Neural and Emotional Impacts of Reward Prediction Errors With  
13 Major Depression. *JAMA Psychiatry*. **74**, 790–797 (2017).
- 14 9. D. Chung *et al.*, Valuation in major depression is intact and stable in a non-learning environment. *Sci Rep*.  
15 **7** (2017), doi:10.1038/srep44374.
- 16 10. A. Kupferberg, L. Bicks, G. Hasler, Social functioning in major depressive disorder. *Neuroscience &*  
17 *Biobehavioral Reviews*. **69**, 313–332 (2016).
- 18 11. M. J. Weightman, T. M. Air, B. T. Baune, A Review of the Role of Social Cognition in Major Depressive  
19 Disorder. *Front. Psychiatry*. **5** (2014), doi:10.3389/fpsyt.2014.00179.
- 20 12. L. M. Fussner, K. J. Mancini, A. M. Luebbe, Depression and Approach Motivation: Differential Relations to  
21 Monetary, Social, and Food Reward. *J Psychopathol Behav Assess*, 1–13 (2017).
- 22 13. A. Bandura, *Social learning theory*. Morristown (NJ: General Learning Press, 1971).
- 23 14. C. J. Burke, P. N. Tobler, M. Baddeley, W. Schultz, Neural mechanisms of observational learning. *PNAS*.  
24 **107**, 14431–14436 (2010).
- 25 15. I. Selbing, B. Lindström, A. Olsson, Demonstrator skill modulates observational aversive learning.  
26 *Cognition*. **133**, 128–139 (2014).
- 27 16. D. Medin, B. Ojalehto, A. Marin, M. Bang, Systems of (non-)diversity. *Nature Human Behaviour*. **1**, 0088  
28 (2017).
- 29 17. C. M. Gillan, M. Kosinski, R. Whelan, E. A. Phelps, N. D. Daw, Characterizing a psychiatric symptom  
30 dimension related to deficits in goal-directed control. *eLife Sciences*. **5**, e11305 (2016).
- 31 18. C. M. Gillan, N. D. Daw, Taking Psychiatry Research Online. *Neuron*. **91**, 19–23 (2016).
- 32 19. D. N. Shapiro, J. Chandler, P. A. Mueller, Using Mechanical Turk to Study Clinical Populations. *Clinical*  
33 *Psychological Science*. **1**, 213–220 (2013).
- 34 20. A. S. Zigmond, R. P. Snaith, The Hospital Anxiety and Depression Scale. *Acta Psychiatrica Scandinavica*.  
35 **67**, 361–370 (1983).
- 36 21. J. T. W. Wigman *et al.*, Evidence That Psychotic Symptoms Are Prevalent in Disorders of Anxiety and  
37 Depression, Impacting on Illness Onset, Risk, and Severity—Implications for Diagnosis and Ultra-High Risk  
38 Research. *Schizophr Bull*. **38**, 247–257 (2012).
- 39 22. D. A. Regier, D. S. Rae, W. E. Narrow, C. T. Kaelber, A. F. Schatzberg, Prevalence of anxiety disorders  
40 and their comorbidity with mood and addictive disorders. *The British Journal of Psychiatry*. **173**, 24–28 (1998).
- 41 23. M. Puskarić, B. von Helversen, J. Rieskamp, How social and non-social information influence  
42 classification decisions: A computational modelling approach. *The Quarterly Journal of Experimental Psychology*.  
43 **70**, 1516–1534 (2017).
- 44 24. S. Palminteri, V. Wyart, E. Koechlin, The Importance of Falsification in Computational Cognitive Modeling.  
45 *Trends in Cognitive Sciences*. **21**, 425–433 (2017).
- 46 25. G. Biele, J. Rieskamp, L. K. Krugel, H. R. Heekeren, The Neural Basis of Following Advice. *PLoS Biol*. **9**,  
47 e1001089 (2011).
- 48 26. I. Selbing, A. Olsson, Beliefs about Others' Abilities Alter Learning from Observation. *Scientific Reports*. **7**,  
49 16173 (2017).
- 50 27. A. Vostroknutov, L. Polonio, G. Coricelli, The Role of Intelligence in Social Learning. *Scientific Reports*. **8**,  
51 6896 (2018).
- 52 28. D. R. Bach, R. J. Dolan, Knowing how much you don't know: a neural organization of uncertainty

- estimates. *Nature Reviews Neuroscience*. **13**, 572–586 (2012).
29. A. Olsson, E. A. Phelps, Social learning of fear. *Nature Neuroscience*. **10**, 1095–1102 (2007).
30. C. J. C. H. Watkins, P. Dayan, Q-learning. *Mach Learn*. **8**, 279–292 (1992).
31. R. B. Zajonc, Social Facilitation. *Science*. **149**, 269–274 (1965).
32. N. Hazem, N. George, M. Baltazar, L. Conty, I know you can see me: Social attention influences bodily self-awareness. *Biological Psychology*. **124**, 21–29 (2017).
33. Q. J. M. Huys, T. V. Maia, M. J. Frank, Computational psychiatry as a bridge from neuroscience to clinical applications. *Nature Neuroscience*. **19**, 404–413 (2016).
34. P. R. Montague, R. J. Dolan, K. J. Friston, P. Dayan, Computational psychiatry. *Trends in Cognitive Sciences*. **16**, 72–80 (2012).
35. P. L. Rock, J. P. Roiser, W. J. Riedel, A. D. Blackwell, Cognitive impairment in depression: a systematic review and meta-analysis. *Psychological Medicine*. **44**, 2029–2040 (2014).
36. L. B. Alloy, J. S. Albright, C. M. Clements, in *Social Processes in Clinical and Counseling Psychology*, J. E. Maddux, C. D. Stoltenberg, R. Rosenwein, Eds. (Springer New York, 1987; [http://link.springer.com/chapter/10.1007/978-1-4613-8728-2\\_8](http://link.springer.com/chapter/10.1007/978-1-4613-8728-2_8)), pp. 94–112.
37. M. Pessiglione, B. Seymour, G. Flandin, R. J. Dolan, C. D. Frith, Dopamine-dependent prediction errors underpin reward-seeking behaviour in humans. *Nature*. **442**, 1042–1045 (2006).
38. M. J. Frank, L. C. Seeberger, R. C. O'Reilly, By Carrot or by Stick: Cognitive Reinforcement Learning in Parkinsonism. *Science*. **306**, 1940–1943 (2004).
39. V. Krishnan, E. J. Nestler, The molecular neurobiology of depression. *Nature* (2008), , doi:10.1038/nature07455.
40. P. R. Albert, C. Benkelfat, L. Descarries, The neurobiology of depression—revisiting the serotonin hypothesis. I. Cellular and molecular mechanisms. *Philos Trans R Soc Lond B Biol Sci*. **367**, 2378–2381 (2012).
41. K.-P. Lesch, J. Waider, Serotonin in the Modulation of Neural Plasticity and Networks: Implications for Neurodevelopmental Disorders. *Neuron*. **76**, 175–191 (2012).
42. C. Chevallier *et al.*, Susceptibility to the audience effect explains performance gap between children with and without autism in a theory of mind task. *Journal of Experimental Psychology: General*. **143**, 972–979 (2014).
43. C. Chevallier *et al.*, Measuring Social Motivation Using Signal Detection and Reward Responsiveness. *PLOS ONE*. **11**, e0167024 (2016).
44. M. M. Herzallah *et al.*, Learning from negative feedback in patients with major depressive disorder is attenuated by SSRI antidepressants. *Front. Integr. Neurosci*. **7** (2013), doi:10.3389/fnint.2013.00067.
45. K. N. Laland, Social learning strategies. *Learn Behav*. **32**, 4–14 (2004).
46. S. R. X. Dall, L.-A. Giraldeau, O. Olsson, J. M. McNamara, D. W. Stephens, Information and its use by animals in evolutionary ecology. *Trends in Ecology & Evolution*. **20**, 187–193 (2005).
47. R. Boyd, P. J. Richerson, An evolutionary model of social learning: the effects of spatial and temporal variation. *Social learning: psychological and biological perspectives*, 29–48 (1988).
48. R. Ligneul, I. Obeso, C. C. Ruff, J.-C. Dreher, Dynamical Representation of Dominance Relationships in the Human Rostromedial Prefrontal Cortex. *Current Biology*. **26**, 3107–3115 (2016).
49. C. Qu, R. Ligneul, J.-B. Van der Henst, J.-C. Dreher, An Integrative Interdisciplinary Perspective on Social Dominance Hierarchies. *Trends in Cognitive Sciences*. **21**, 893–908 (2017).
50. N. N. Oosterhof, A. Todorov, The functional basis of face evaluation. *PNAS*. **105**, 11087–11092 (2008).
51. A. Todorov, R. Dotsch, J. M. Porter, N. N. Oosterhof, V. B. Falvello, Validation of data-driven computational models of social perception of faces. *Emotion*. **13**, 724–738 (2013).
52. S. Palminteri, M. Khamassi, M. Joffily, G. Coricelli, Contextual modulation of value signals in reward and punishment learning. *Nature Communications*. **6**, ncomms9096 (2015).

## 00 **H2: Acknowledgments**

01 SP is supported by an ATIP-Avenir grant (R16069JS) Collaborative Research in Computational Neuroscience  
 02 ANR-NSF grant (ANR-16-NEUC-0004), the Programme Emergence(s) de la Ville de Paris and the Fyssen  
 03 foundation. LS was supported by a PHD fellowship of the ENS/PSL. The Institut d'Etude de la Cognition is  
 04 supported financially by the LabEx IEC (ANR-10-LABX-0087 IEC) and the IDEX PSL\* (ANR-10-IDEX-0001-02  
 05 PSL\*). The funders had no role in the conceptualization, design, data collection, analysis, decision to publish, or  
 06 preparation of the manuscript.

07

08

09

## Figures and Tables

### Typical 'Private' trial

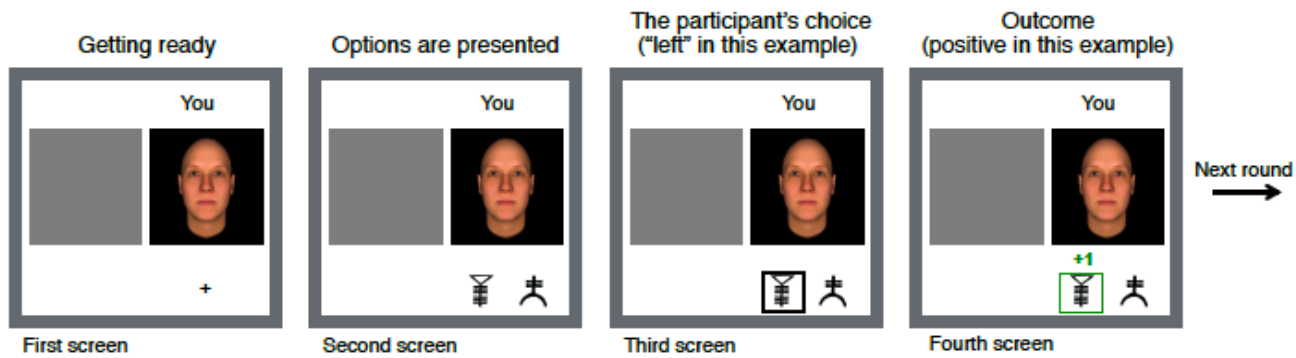

### Typical 'Social-Choice' observation trial

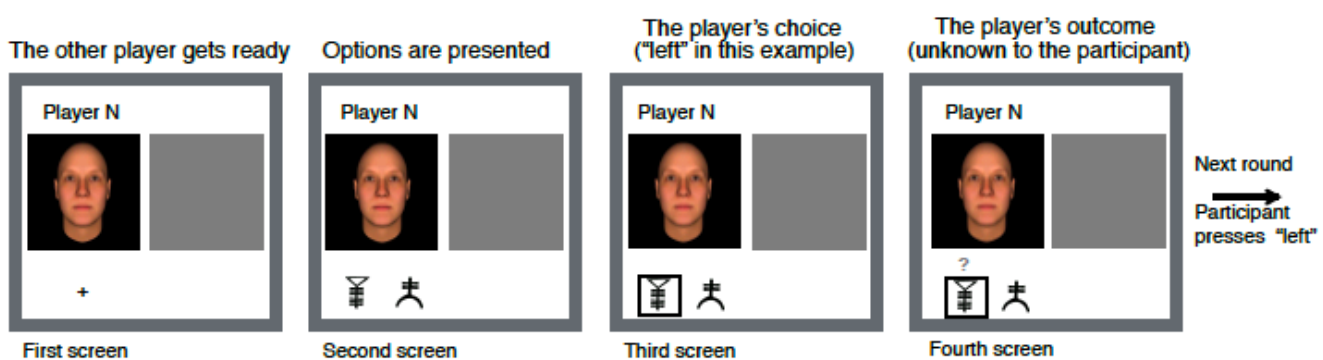

### Typical 'Social-Choice+Outcome' observation trial

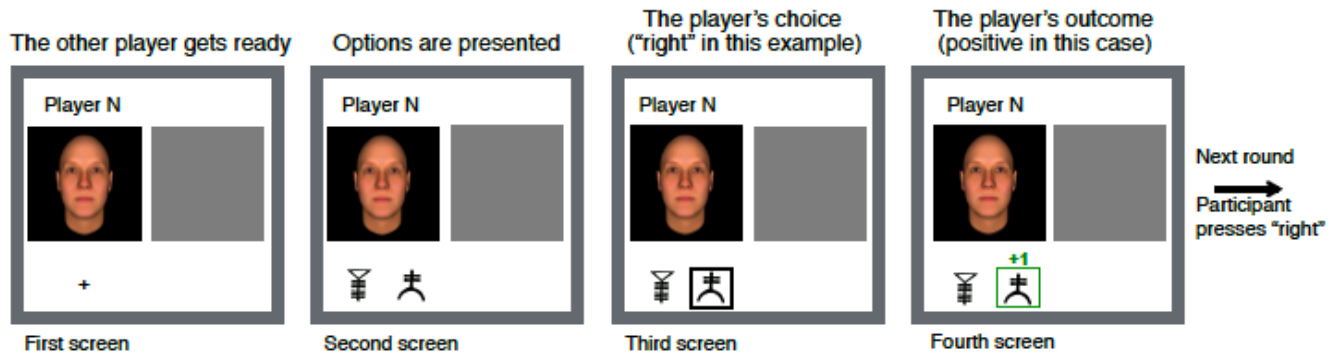

10

### Figure 1: behavioral task.

In each condition, participants played in turn with a simulated demonstrator. In each private trial, after each choice, participants received a reward or a punishment. In the Private condition, participants did not see the choice or the outcome of the demonstrator. In the Choice observation condition, the choice of their demonstrator was displayed at each trial. In the Social-Choice+Outcome condition, both the choice and the outcome of the demonstrator were displayed. Note that the Social-Choice and the Social-Choice+Outcome also involved private trials.

18

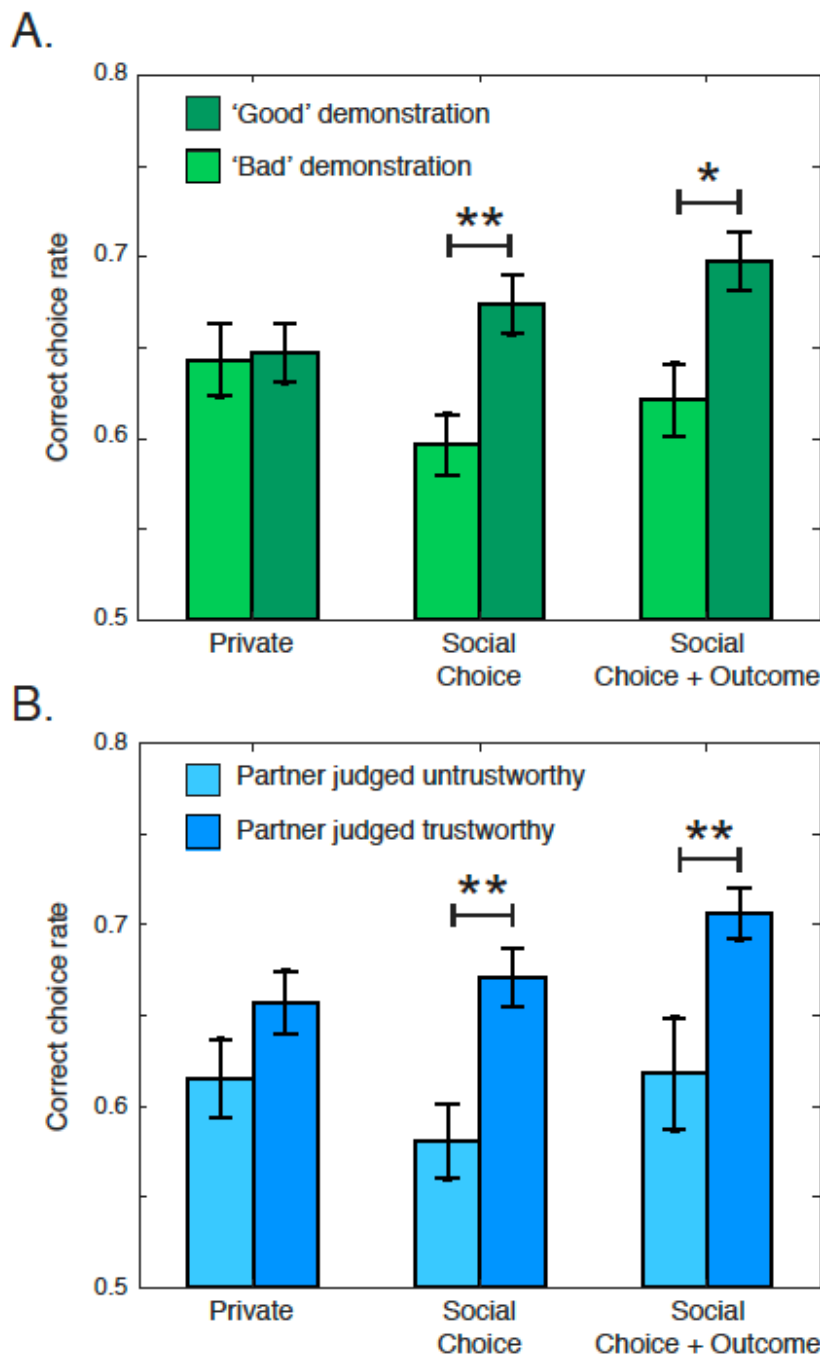

**Figure 2: assessing social reinforcement learning**

**(A) Effect of demonstrator's behavior.** The demonstrator's performance and the participant's depression score influenced the correct choice rate in the 'Choice' and in the 'Social-Choice+Outcome' conditions, such that observing a virtual player with a low correct choice rate ('Bad' demonstration ; light green) induced a lower correct choice compared to observing a virtual player with a high correct choice rate ('Good' demonstration; dark green) ('Social-Choice':  $t(198) = 3.17, p = .002$ ; 'Social-Choice+Outcome' :  $t(198) = 2.47, p = .014$ ). **(B) Effect of perceived trustworthiness.** Participants who rated the demonstrator's avatar as trustworthy had a higher correct choice rate in the 'Social-Choice' and 'Social-Choice+Outcome' conditions compared those who rated the avatar as untrustworthy ('Social-Choice':  $t(76) = 3.22, p = .002$ , 'Social-Choice+Outcome':  $t(76) = -2.87, p = .005$ )



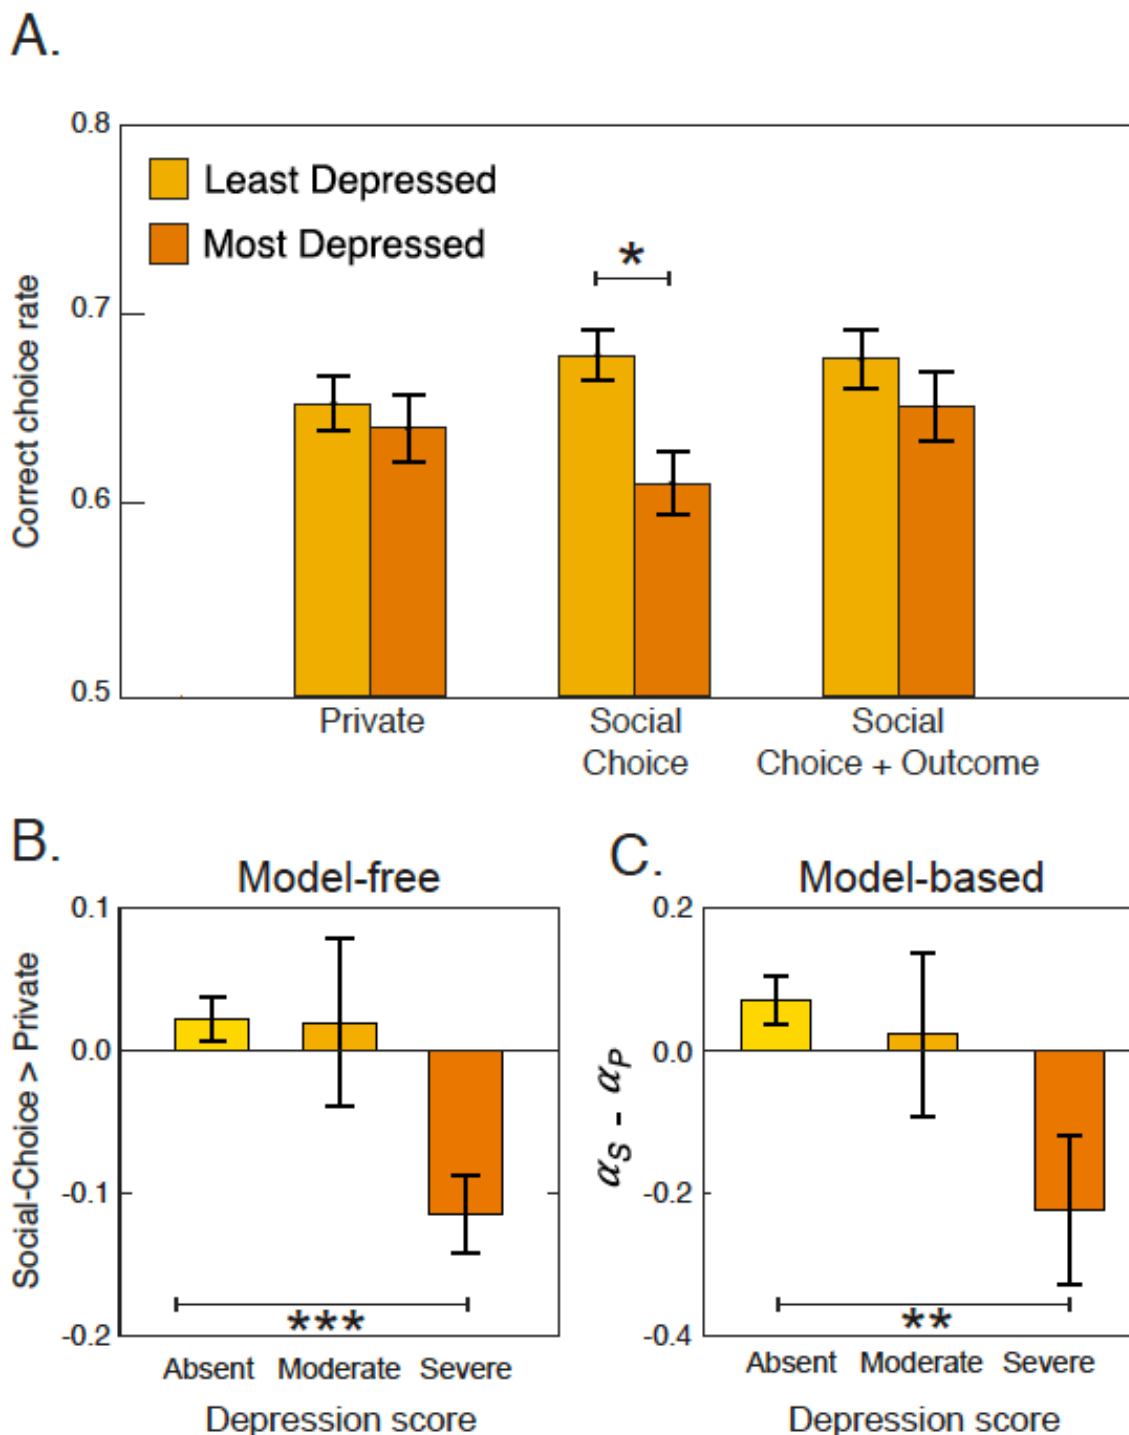

**Figure 3: effect of depression on reinforcement learning in social contexts.**

**(A) Effect of depression.** The participant's depression score influenced the correct choice rate in the 'Social-Choice' condition, such that participants with higher score had a lower correct choice rate in the 'Social-Choice' condition (median split:  $t(98) = -2.69$ ,  $p = .008$ ). **(B) Model-free classification.** The correct choice rate difference between the Private and the 'Social-Choice' conditions was significantly different between participants with 'Absent' and 'Severe' depressive symptoms ( $t(83) = 3.61$ ,  $p < .001$ ). **(C) Model-based classification.** The difference between the learning rate of the 'Private' and the social information contexts was significantly different between participants with 'Absent' and 'Severe' depressive symptoms ( $t(83) = -3.20$ ,  $p = .002$ ). Absent and Severe depressive symptoms correspond to scores  $< 8$  and scores  $> 10$  on the HAD depression subscale, respectively.



43

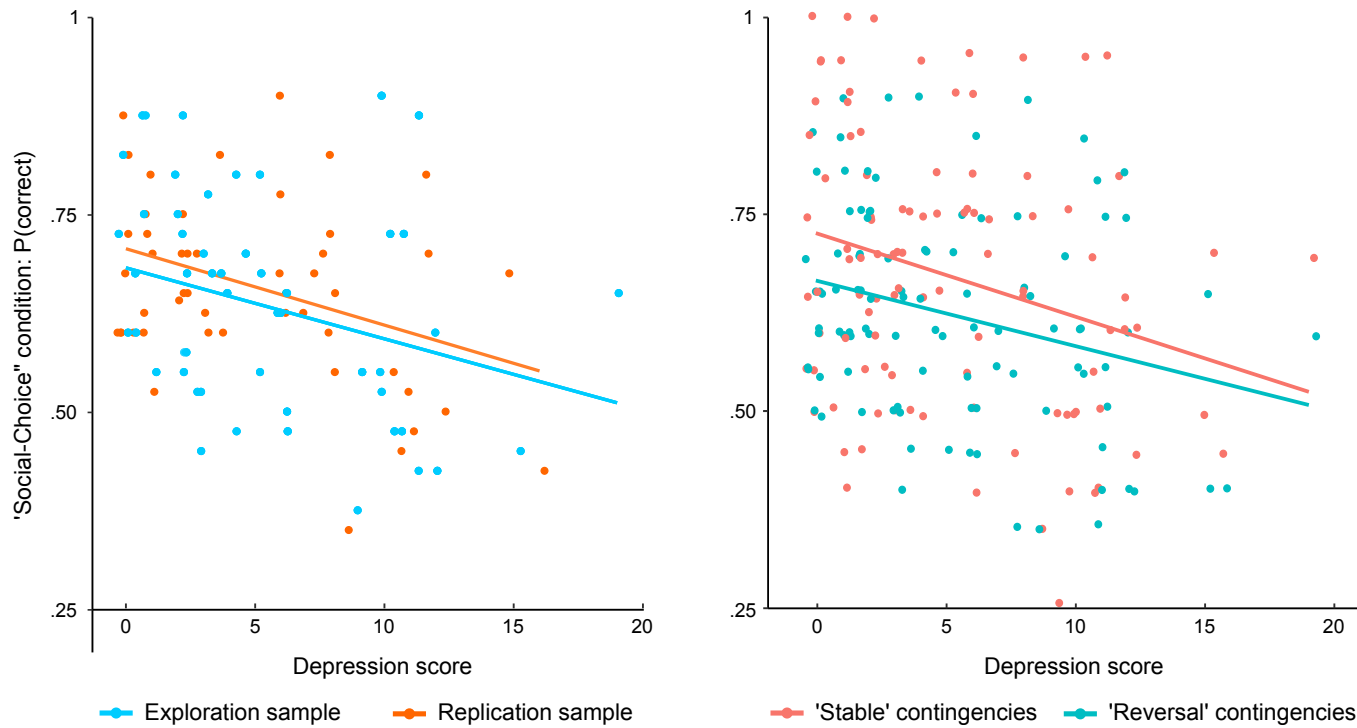

44

45

46

47

48

49

50

51

**Figure 4: robustness of the result.** The scatter plots represent the correlation between correct response rates in the 'Social-Choice' condition and depression scores separately for each experiment (right; exploration sample:  $r = -.29$ ,  $t(48) = -2.15$ ,  $p = .036$ ; replication sample:  $r = -.37$ ,  $t(48) = -2.75$ ,  $p = .008$ ) and reward contingency (right; exploration sample:  $r = -.27$ ,  $t(98) = -2.83$ ,  $p = .006$ ; replication sample:  $r = -.27$ ,  $t(48) = -2.81$ ,  $p = .006$ ;  $r$  and  $p$ : Pearson's coefficient statistical significance).

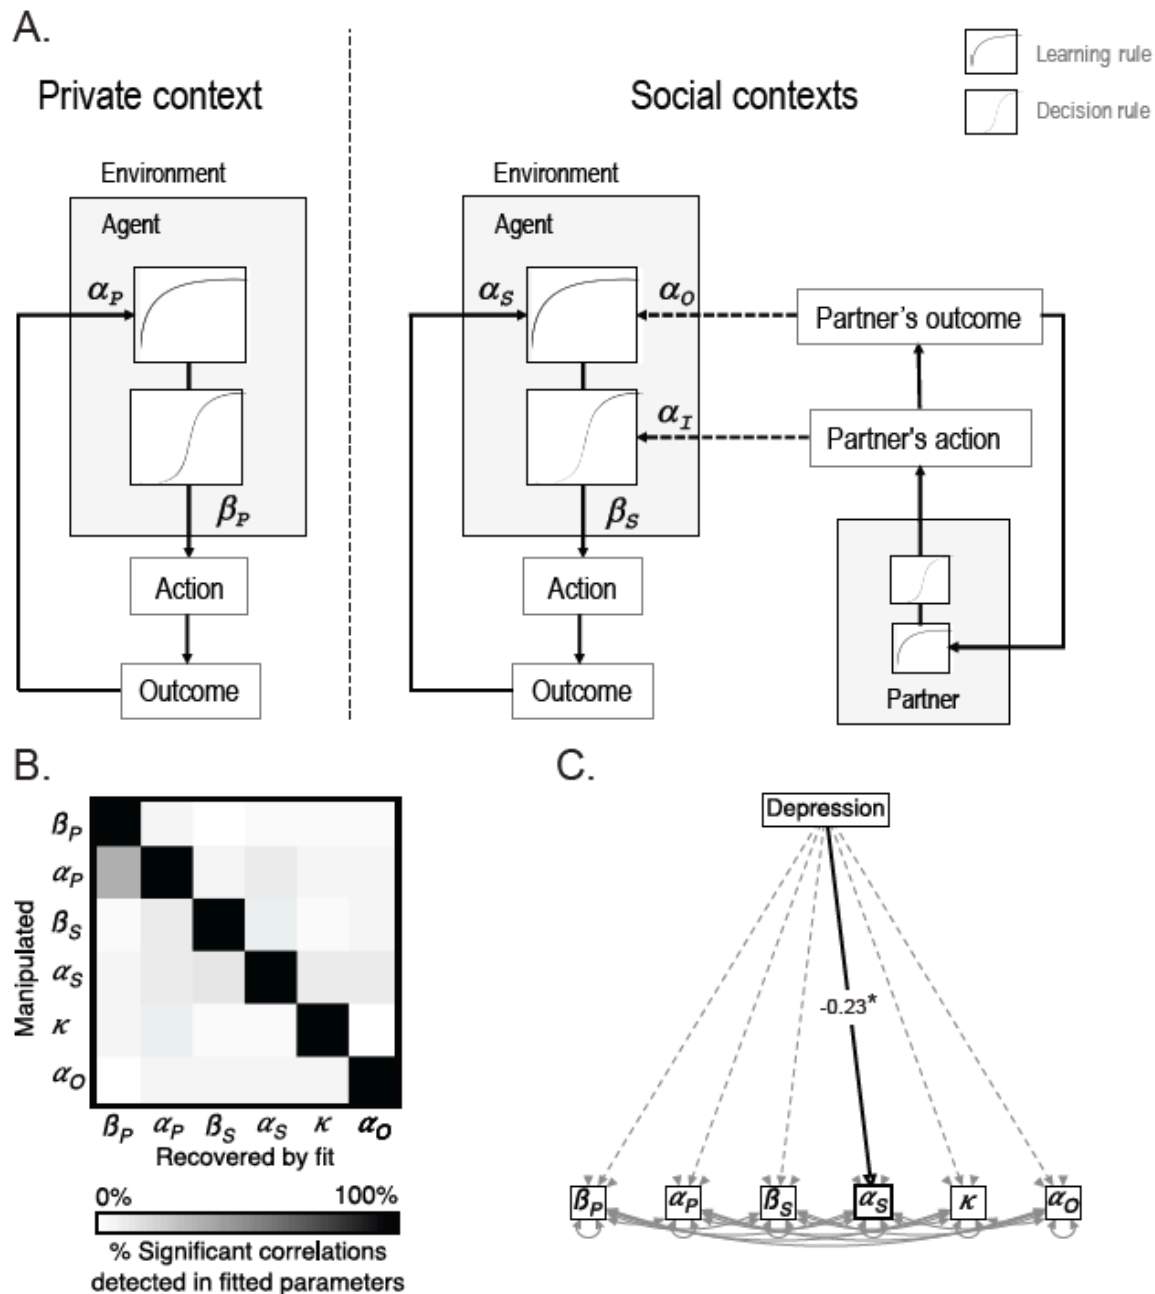

**Figure 5: social reinforcement learning model and computational results.**

**(A) Computational model.** A social reinforcement learning model was fitted on participants' behavior. In the 'Private' condition ('Private context'), the model corresponded to a classical Q-learning (or Rescorla-Wagner) model. In Social context' ('Social-Choice' and 'Social-Choice+Outcome' conditions), the model assumes that social information is integrated into the learning and decision process. Following Burke et al. (14), choice probability was updated based on the demonstrator's action (imitation) in the 'Social-Choice' condition and the option value was updated when the demonstrator's outcome was presented (counterfactual learning) in the 'Social-Choice+Outcome' condition. The proposed model also allows for different private parameters (learning rate,  $\alpha_S$ , and choice randomness,  $\beta_S$ ) being in the Social context. **(B) Parameter recovery.** To assess the sensitivity and the specificity of our model fitting procedure, we conducted a parameter recovery analysis. The matrix represents the percentage of significant correlations detected between different combinations of parameters. The diagonal cases correspond to the correlations that are accurately recovered; the other cases correspond to correlations that are spuriously recovered. **(C) Effect of depression on the model parameters.** Depression was specifically associated with a decrease in the private learning rate in the Social context ( $\alpha_S$ ), even controlling for the correlation between the different model parameters (structural equation modeling).

## Tables

**Table 1:** descriptive statistics for age, gender, depression and anxiety scores. For each sample, the mean of each demographic variable is presented with its 95% confidence interval.

|                           | Age                       | Sex ratio<br>(% women)                      | Depression              | Anxiety                 |
|---------------------------|---------------------------|---------------------------------------------|-------------------------|-------------------------|
| First sample<br>(N = 50)  | 33.02 ± 1.25<br>[22 – 62] | 28%                                         | 5.46 ± 1.26<br>[0 – 19] | 6.40 ± 1.16<br>[0 – 15] |
| Second sample<br>(N = 50) | 33.76 ± 3.28<br>[19 – 61] | 42%                                         | 4.96 ± 1.27<br>[0 – 16] | 6.30 ± 1.28<br>[0 – 20] |
| Statistical<br>difference | t(98) = 0.36<br>p > .250  | X-squared = 1.58,<br>df = 1, p-value = .208 | t(98) = 0.56 p > .250   | t(98) = 0.12 p > .250   |

76 **Table 2:** statistical effect (mixed linear model) of social task conditions ('Social-Choice' and 'Social-  
77 Choice+Outcome'), performance of the virtual demonstrator, perceived trustworthiness ('Trustworthiness'),  
78 psychiatric scores ('Depression' and 'Anxiety'), and their interaction when comparing to the 'Private' condition.  
79

| Effect                                           | Coefficient | SEM  | DF  | T-value | P-value |
|--------------------------------------------------|-------------|------|-----|---------|---------|
| Social-Choice                                    | -0.18       | 0.06 | 489 | -2.58   | 0.010*  |
| Social-Choice+Outcome                            | -0.13       | 0.07 | 489 | -1.92   | 0.055°  |
| Demonstrator performance                         | 0.01        | 0.06 | 489 | 0.15    | 0.883   |
| Trustworthiness                                  | 0.03        | 0.03 | 96  | 1.04    | 0.302   |
| Depression                                       | 0.01        | 0.02 | 96  | 0.47    | 0.638   |
| Anxiety                                          | -0.01       | 0.02 | 96  | -0.46   | 0.643   |
| Social-Choice x Demonstrator performance         | 0.21        | 0.08 | 489 | 2.54    | 0.011*  |
| Social-Choice+Outcome x Demonstrator performance | 0.20        | 0.09 | 489 | 2.18    | 0.030*  |
| Social-Choice x Trustworthiness                  | 0.05        | 0.03 | 489 | 1.48    | 0.140   |
| Social-Choice+Outcome x Trustworthiness          | 0.04        | 0.03 | 489 | 1.22    | 0.222   |
| Social-Choice x Depression                       | -0.05       | 0.02 | 489 | -2.64   | 0.009** |
| Social-Choice+Outcome x Depression               | -0.00       | 0.02 | 489 | -0.00   | 0.999   |
| Social-Choice x Anxiety                          | 0.01        | 0.02 | 489 | 0.72    | 0.475   |
| Social-Choice+Outcome x Anxiety                  | -0.01       | 0.02 | 489 | -0.51   | 0.614   |

80  
81  
82

83 **Table 3:** Estimated model parameters for the actual participants and for the simulated virtual demonstrators  
84 (mean  $\pm$  95% c.i.).

|                               | Participants    | Virtual demonstrators        |
|-------------------------------|-----------------|------------------------------|
| $\beta_{\text{private}}$      | $2.20 \pm 0.47$ | $9.54 \pm 0.49$ (real: 10)   |
| $\alpha_{\text{private}}$     | $0.58 \pm 0.05$ | $0.52 \pm 0.02$ (real: 0.50) |
| $\beta_{\text{social}}$       | $1.83 \pm 0.34$ |                              |
| $\alpha_{\text{social}}$      | $0.60 \pm 0.06$ |                              |
| $\kappa$                      | $0.13 \pm 0.02$ |                              |
| $\alpha_{\text{observation}}$ | $0.46 \pm 0.06$ |                              |

85
